# Supplementary material
Source: PubMed Central journal article supplement (PMC5327883)

Article

## Mesoporous Silica Nanoparticles with Co-Condensed Gadolinium Chelates for Multimodal Imaging

Kathryn M. L. Taylor-Pashow<sup>1,†</sup>, Joseph Della Rocca<sup>2,†</sup> and Wenbin Lin<sup>2,\*</sup>

<sup>1</sup> Savannah River National Laboratory, Savannah River Site, Bldg. 773-A, Aiken, SC 29808, USA; E-Mail: [kathryn.taylor-pashow@srnl.doe.gov](mailto:kathryn.taylor-pashow@srnl.doe.gov)

<sup>2</sup> Department of Chemistry, CB #3290, University of North Carolina at Chapel Hill, Chapel Hill, NC 27599, USA; E-Mail: [dellaroc@ad.unc.edu](mailto:dellaroc@ad.unc.edu)

<sup>†</sup> These authors contribute equally to this work.

\* Author to whom correspondence should be addressed; E-Mail: [wlin@email.unc.edu](mailto:wlin@email.unc.edu); Tel.: +1-919-962-6320; Fax: +1-919-962-2388.

### Supplementary Information

**Figure S1.** TGA of **1** before (black) and after (red) surfactant extraction.

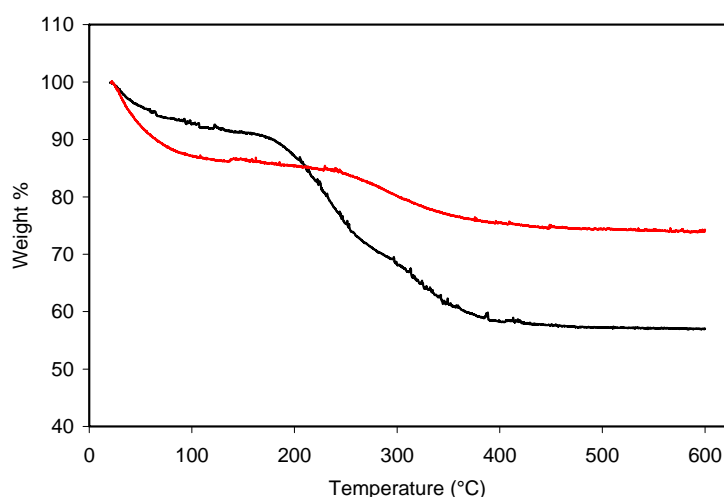

**Figure S2.** TGA of **3** before (black) and after (red) surfactant extraction.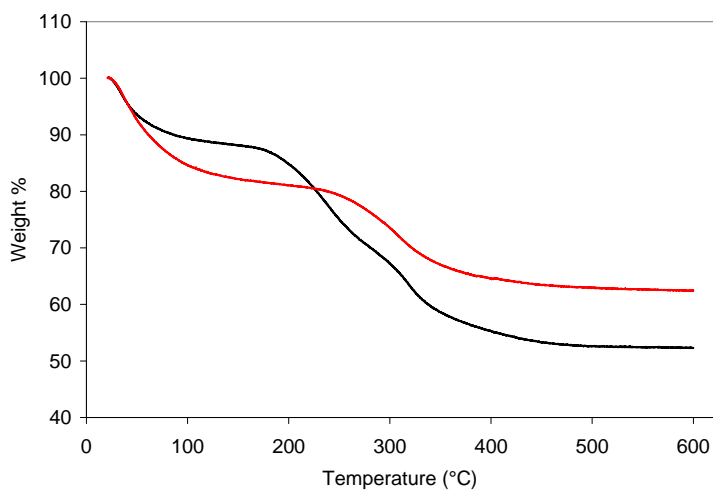**Figure S3.** TGA of **4** before (black) and after (red) surfactant extraction.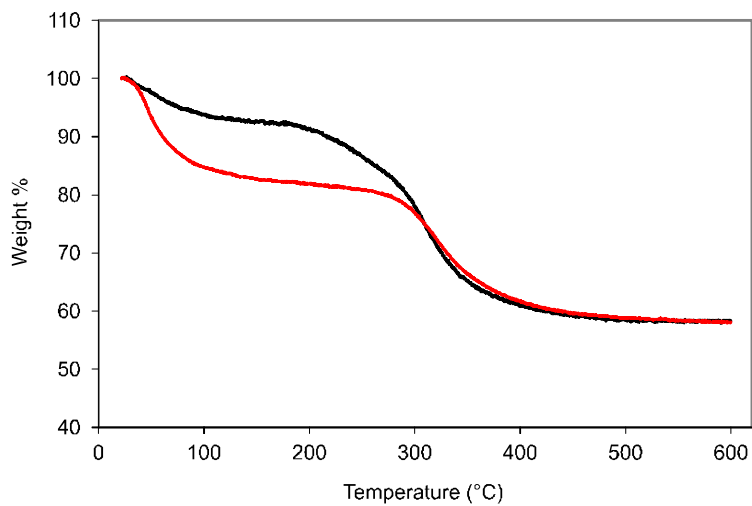**Figure S4.** TGA of **5** before (black) and after (red) surfactant extraction.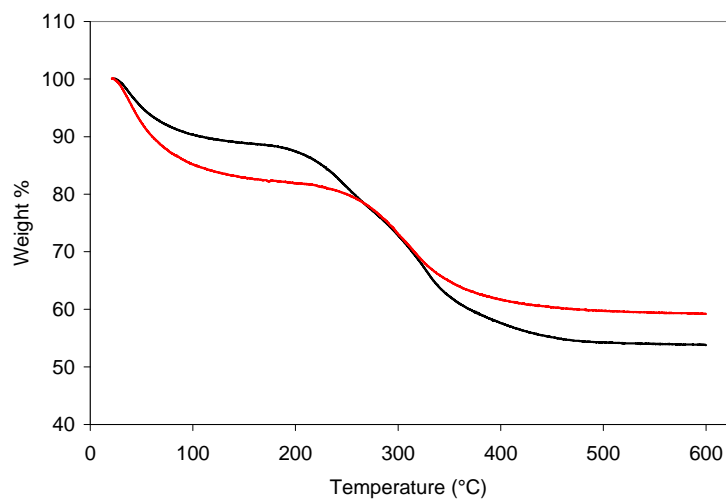

**Figure S5.** PXRD of MCM-41 nanoparticles (black) and co-condensed samples **1** (red), **2** (blue), **3** (orange), **4** (green), and **5** (pink).

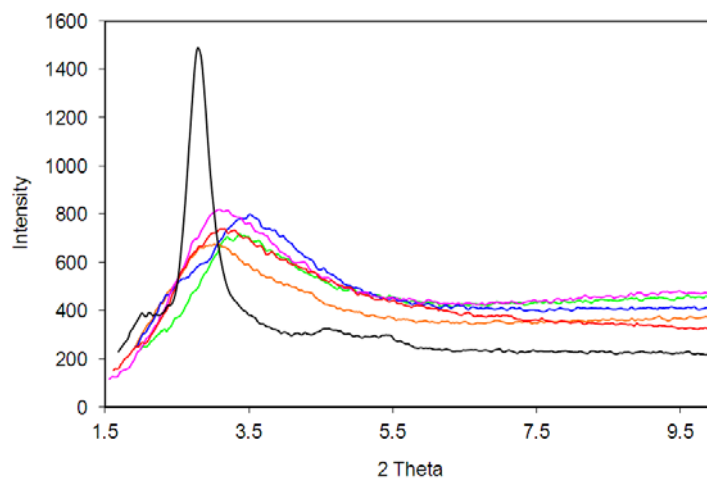

**Figure S6.** Nitrogen adsorption isotherm of **1** (black-adsorption; green-desorption).

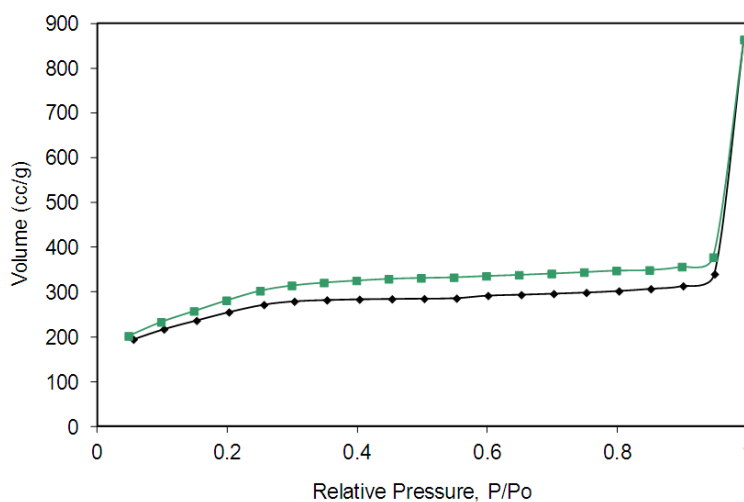

**Figure S7.** Pore size distribution of **1** (black-adsorption; green-desorption).

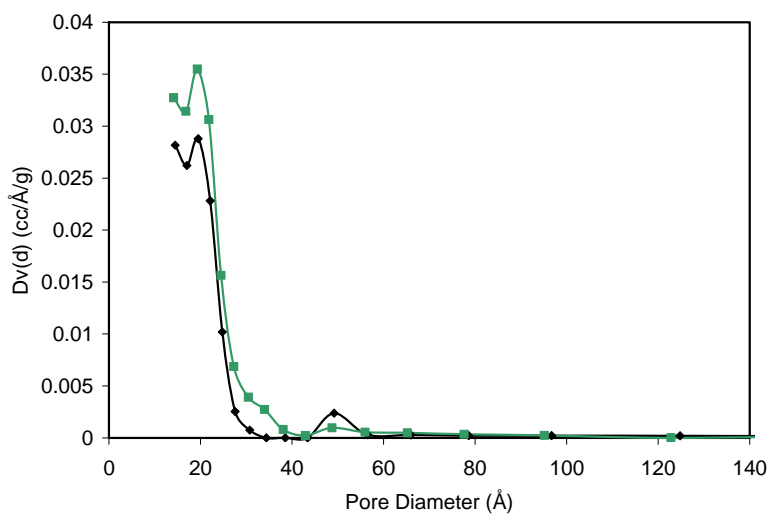

**Figure S8.** Nitrogen adsorption isotherm of **3** (black-adsorption; green-desorption).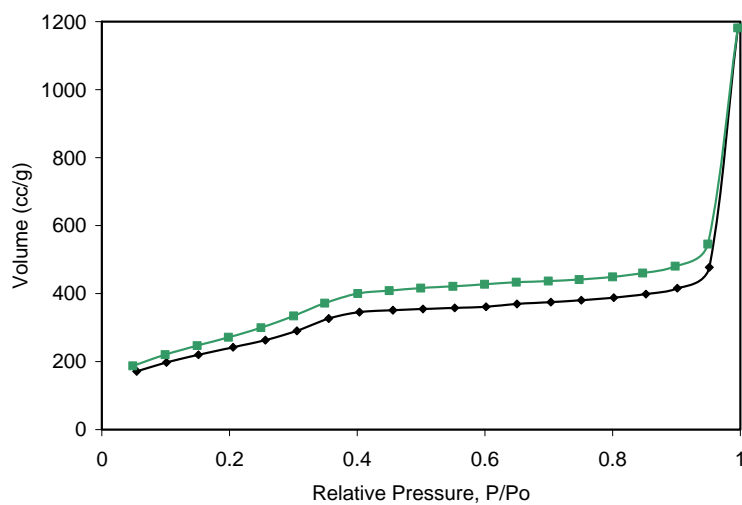**Figure S9.** Pore size distribution of **3** (black-adsorption; green-desorption).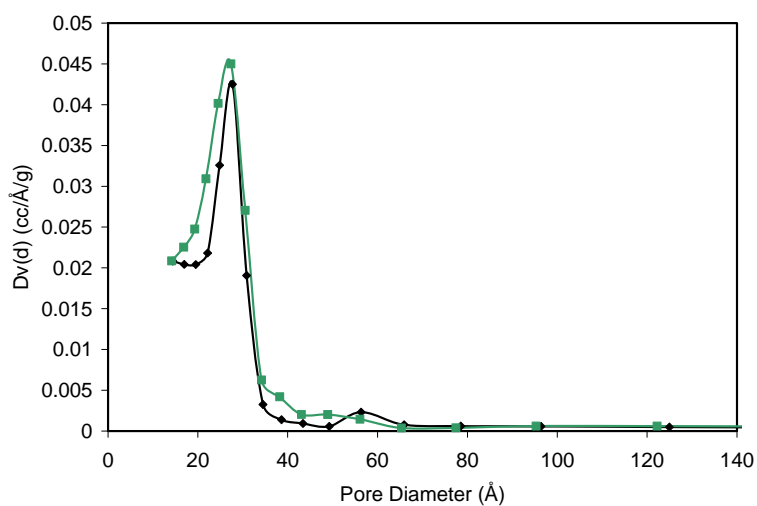**Figure S10.** Nitrogen adsorption isotherm of **4** (black-adsorption; green-desorption).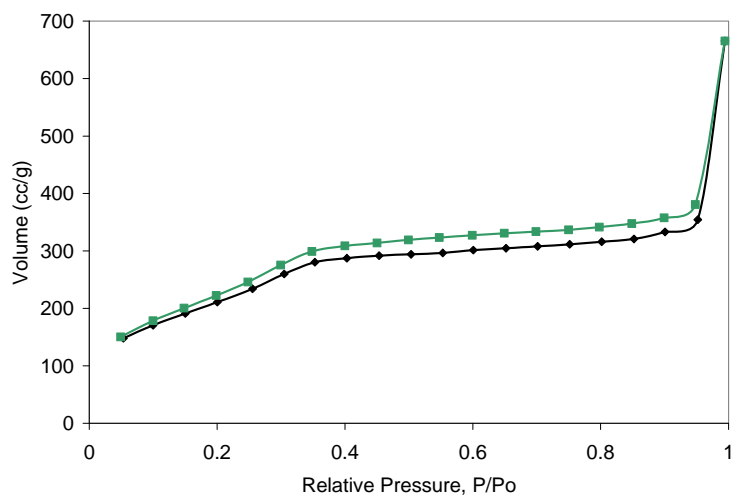

**Figure S11.** Pore size distribution of **4** (black-adsorption; green-desorption).

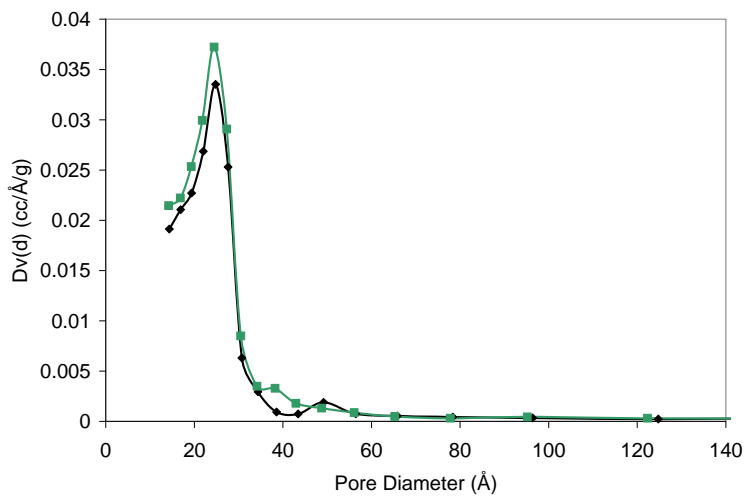

**Figure S12.** Nitrogen adsorption isotherm of **5** (black-adsorption; green-desorption).

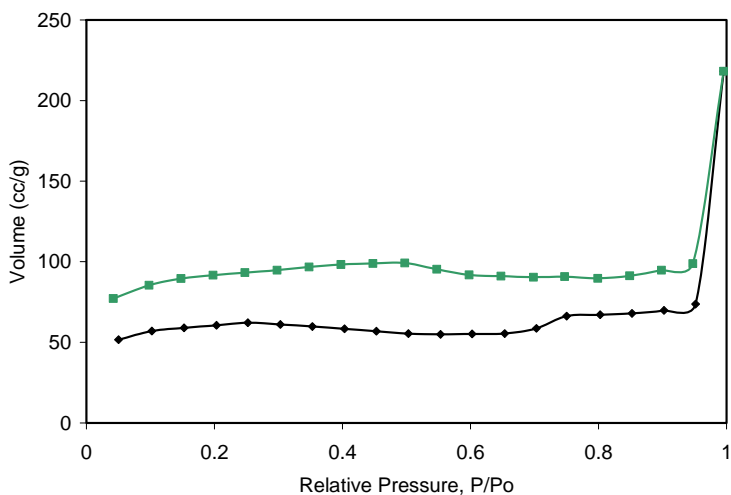

**Figure S13.** Pore size distribution of **5** (black-adsorption; green-desorption).

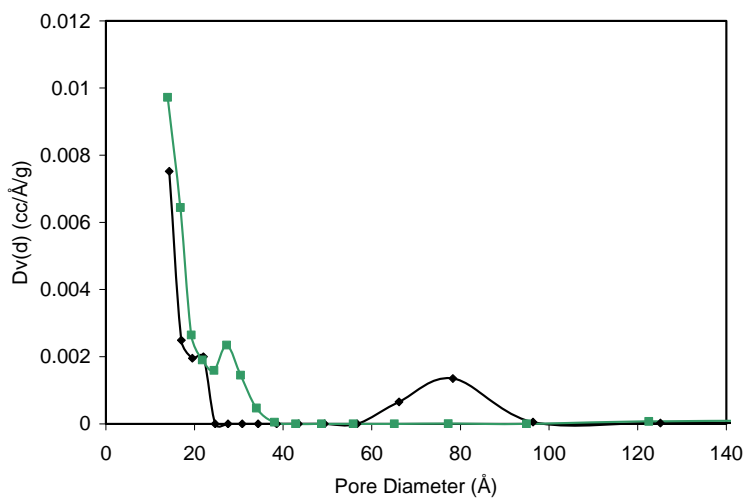

**Figure S14.**  $r_1$  (blue) and  $r_2$  (red) relaxivity curves of **1** measured at 3 T.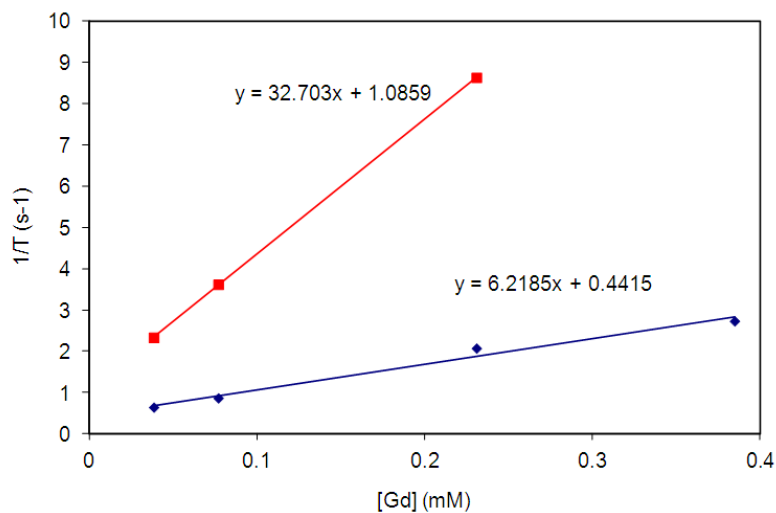**Figure S15.**  $r_1$  (blue) and  $r_2$  (red) relaxivity curves of **3** measured at 3 T.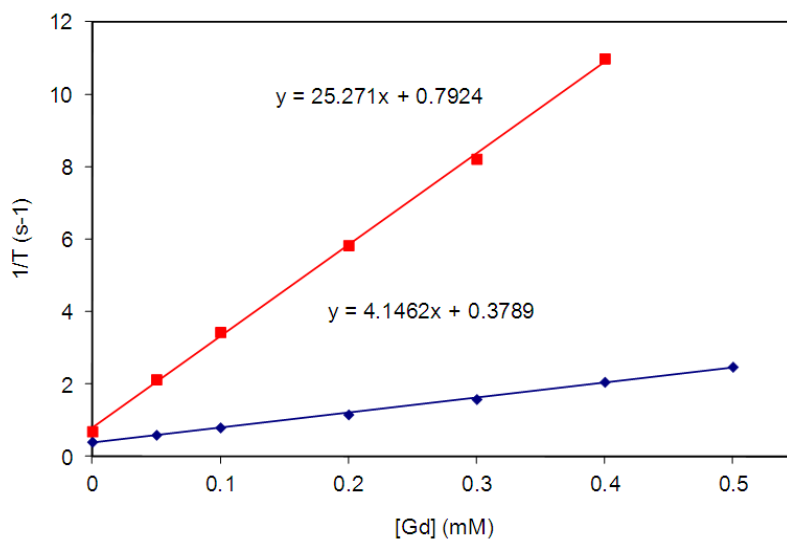**Figure S16.**  $r_1$  (blue) and  $r_2$  (red) relaxivity curves of **4** measured at 3 T.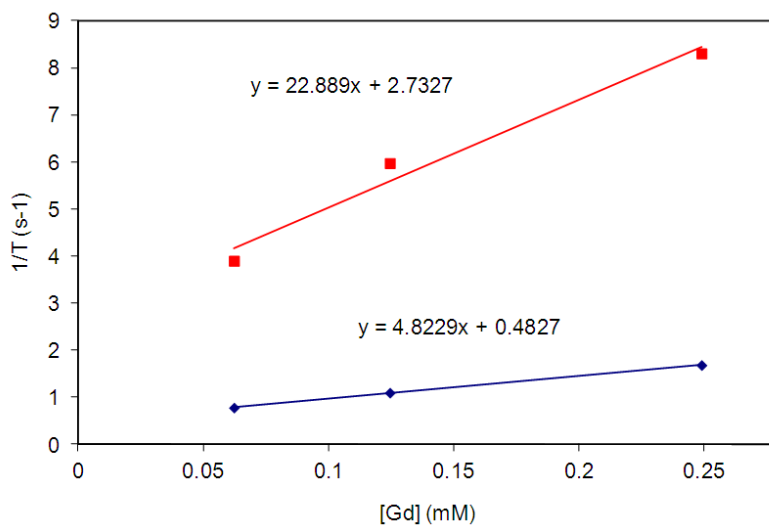

**Figure S17.**  $r_1$  (blue) and  $r_2$  (red) relaxivity curves of **5** measured at 3 T.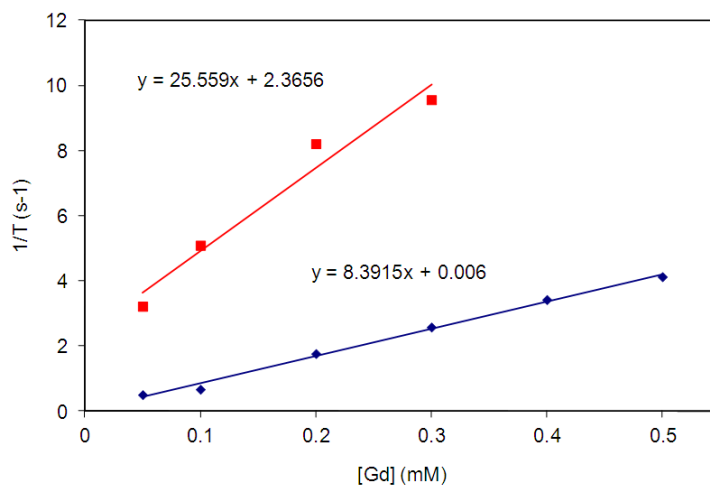**Figure S18.** Confocal Scanning Laser Microscopy images of HT-29 cells incubated with no particle (**top**), 500  $\mu$ g **4** (**middle**), or 500  $\mu$ g **4**-RGD (**bottom**). The rhodamine fluorescence channel is on the left and the DIC image is on the right. The scale bar designates 25  $\mu$ m.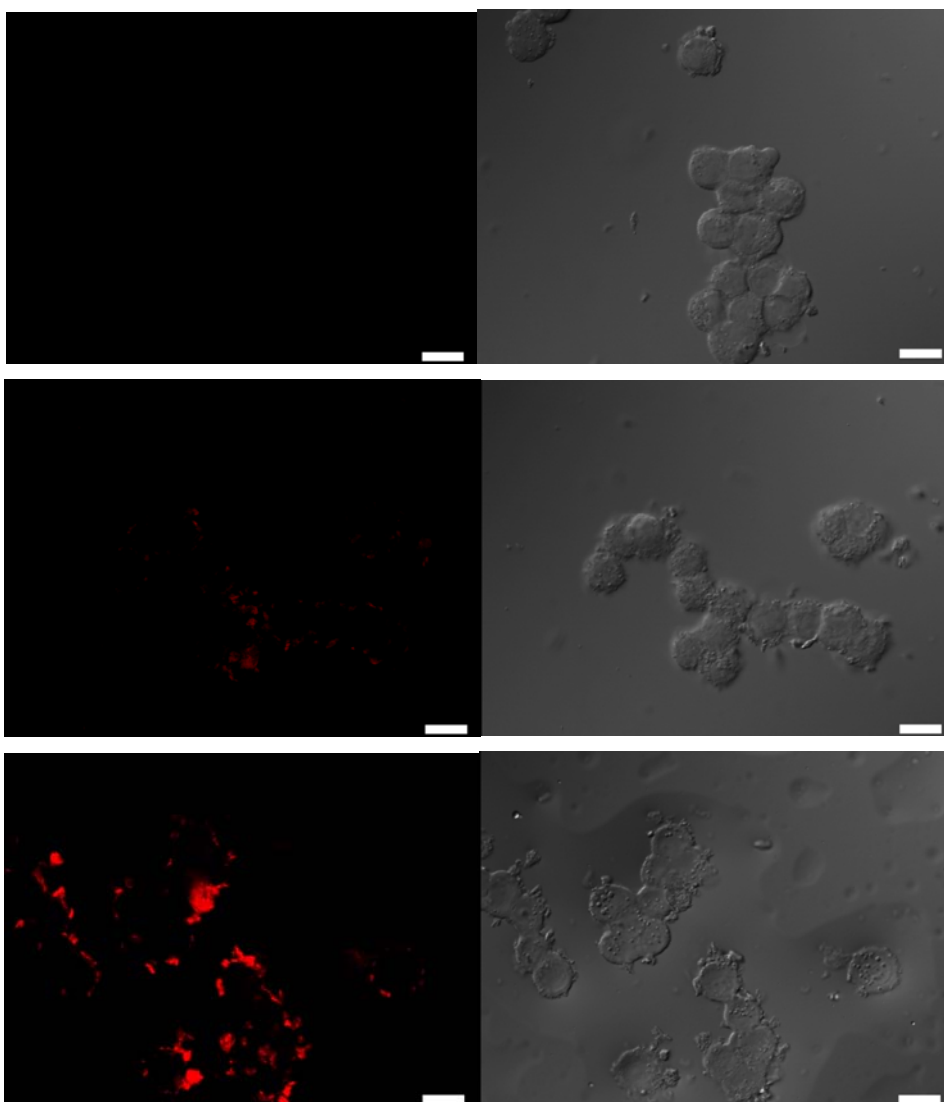

Supplement: nanomaterials-02-00001-s001.pdf [file nanomaterials-02-00001-s001.pdf]
